# Supplementary material
Source: PubMed Central journal article supplement (PMC10240919)
Supplement: plantbiotechnology-39-4-22.0823a-s001.pdf [file plantbiotechnology-39-4-22.0823a-s001.pdf]

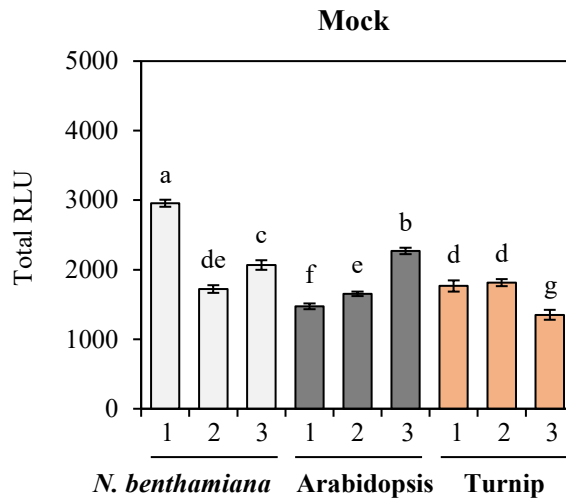

Supplementary Figure S1. Total RLU of mock treatment in *N. benthamiana*, Arabidopsis, and turnip. The results of three individual tests are shown. Each number under the horizontal axis indicates the replicate number of (Figure 3 A-C). Data are presented as means  $\pm$  SD (n=8, biological replicates). Significance was analyzed by one-way ANOVA and Tukey HSD test. Different letters indicate significant differences ( $P < 0.05$ ).

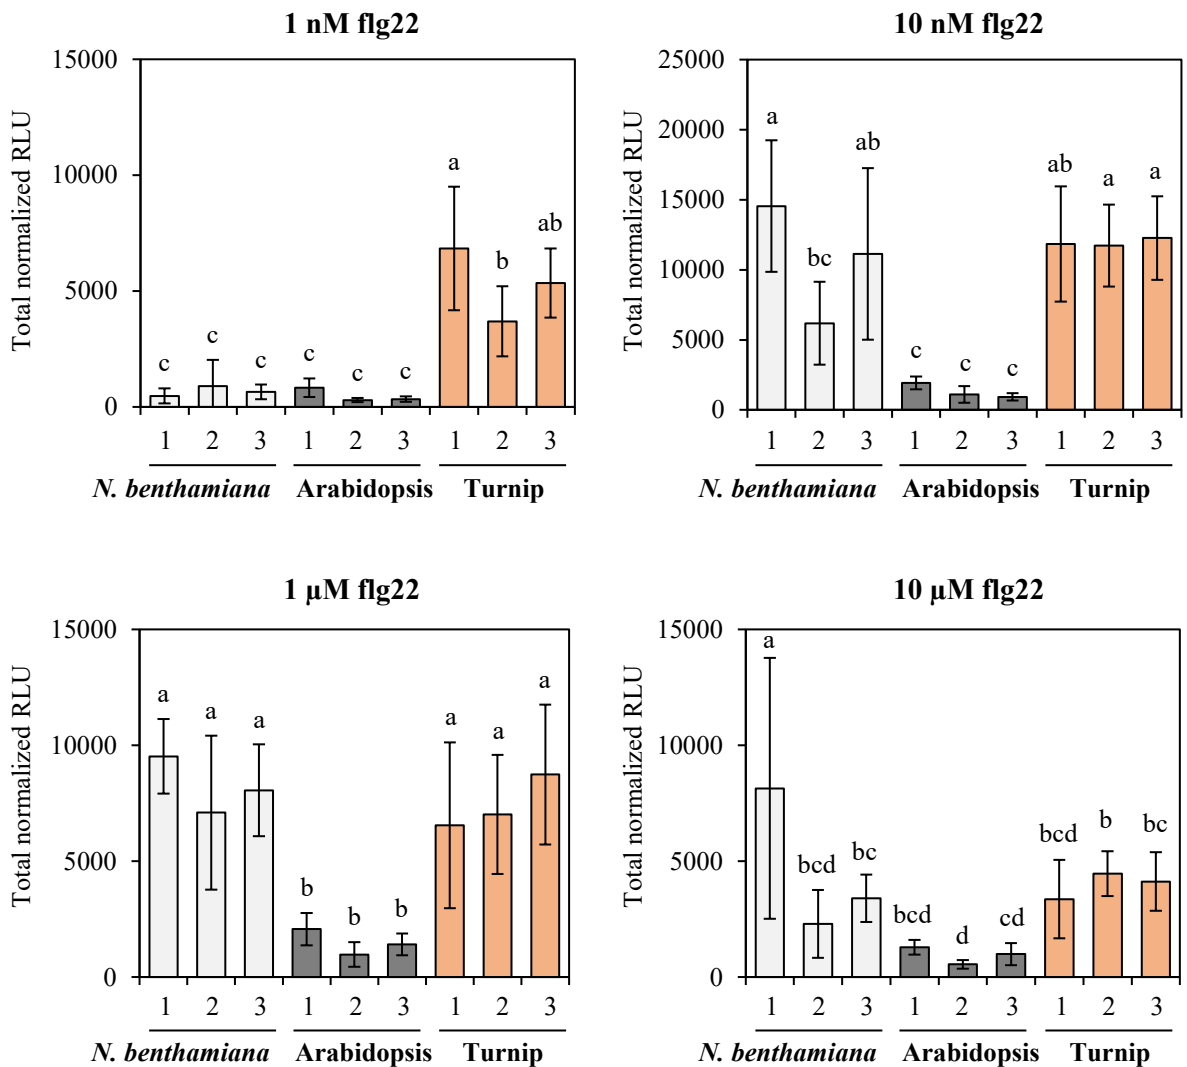

Supplementary Figure S2. Total Normalized RLU after removal of background in different concentrations of flg22 treatment. Each number under the horizontal axis indicates the replicate number of (Supplementary Figure S1). The background RLU was subtracted from that of each flg22 treatment in *N. benthamiana*, Arabidopsis, and turnip, respectively. Data are presented as means  $\pm$  SD (n=8, biological replicates). Significance was analyzed by one-way ANOVA and Tukey HSD test. Different letters indicate significant differences ( $P < 0.05$ ).
